# Supplementary material for: Formation of target-specific binding sites in enzymes: solid-phase molecular imprinting of HRP
Source: Royal Society of Chemistry journal article supplement (doi:10.1039/c6nr02009g), 2016-01-01
Supplement: c6nr02009g1.pdf [file c6nr02009g1.pdf]

## Electronic Supporting Information

### Formation of target-specific binding sites in enzymes. Solid-phase molecular imprinting of HRP

J. Czulak, A. Guerreiro, K. Metran, F. Canfarotta, A. Goddard, R. H. Cowan, A. W. Trochimczuk, S. Piletsky

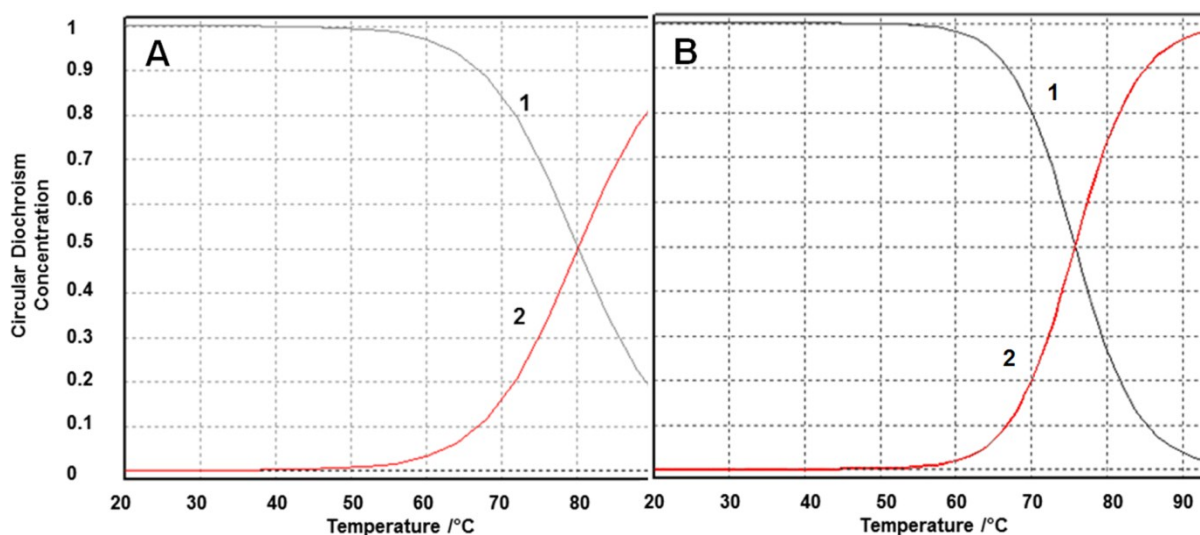

**Figure ESI 1.** Thermal denaturation of imprinted cross-linked HRP (A) and native non-cross-linked HRP processed through the immobilized template (vancomycin) but without addition of GA (B). Changes in folded (1) and unfolded (2) forms of HRP in response to increased temperature.

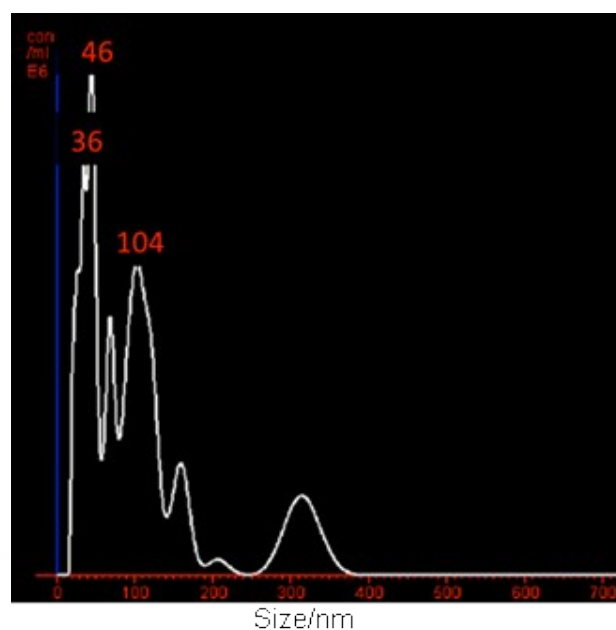

**Figure ESI 2.** Nanoparticle Tracking Analysis trace of cross-linked HRP nanoparticles in water obtained on a Nanosight instrument.
